# Supplementary material
Source: publisher site journal article supplement (https://www.dovepress.com/article/256838)
Supplement: Supplementary file 1 [file get_supplementary_file.php]

# Supplementary material

Appendix 1. Description of registries with references

Appendix 2: Flowchart of the study cohorts

Appendix 3. Diagnostic codes

Appendix 4. Supplementary figures

**Appendix 1**

Data were extracted from the following registries:

The Danish Civil Registration System, established in 1967, was used to identify the members of the comparison cohorts1 We also used this registry to extract data on sex, date of birth, immigration/emigration, loss to follow-up and death of all study participants.

The Danish National Patient Registry, established in 1977, records data on all patients discharged from non-psychiatric hospitals. Since 1994 it has also included data on all visits to outpatient departments and emergency clinics in Denmark.2,3 Diagnoses are coded by the attending physician according to the International Classification of Diseases, Eighth Revision [ICD-8] until 31 December 1993 and thereafter by the Tenth Revision [ICD-10].2 From this registry we extracted clinical diagnoses of dementia, epilepsy, and diagnoses used to calculate Charlson Comorbidity Index scores.4

The Danish Cancer Registry was established in 1943. Since March 1987, reporting of data on all malignant diseases has been mandatory. Approximately 90% of cases in the registry are verified by histological examination. An extensive data validation program ensures the quality and completeness of registry data.5 From this registry, we extracted data on cancer diagnoses.

Statistics Denmark provided access to the following registries: (I) The Danish Educational Attainment Registry, from which we extracted data on educational achievement of members of the study cohorts.6 (II) The Employment Classification Module provided data on the employment status of study participants in each calendar year of the study period. It also provided data on receipt of disability pensions.7 (III) The housing module provided data on residency in a nursing home in each calendar year of the study period.8

**Supplementary references**

1. Schmidt M, Pedersen L, Sorensen HT. The Danish Civil Registration System as a tool in

epidemiology. *Eur J Epidemiol* 2014;29(8):541-9.

2. Lynge E, Sandegaard JL, Rebolj M. The Danish National Patient Register. *Scand J Public Health*

2011;39(7 Suppl):30-3.

3. Schmidt M, Schmidt SA, Sandegaard JL, Ehrenstein V, Pedersen L, Sorensen HT. The Danish

National Patient Registry: a review of content, data quality, and research potential. *Clin Epidemiol*

2015;7:449-90.

4. Charlson ME, Pompei P, Ales KL, MacKenzie CR. A new method of classifying prognostic

comorbidity in longitudinal studies: development and validation. *J Chronic Dis* 1987;40(5):373-83.

5. Storm HH, Michelsen EV, Clemmensen IH, Pihl J. The Danish Cancer Registry--history, content,

quality and use. *Dan Med Bull* 1997;44(5):535-9.

6. Jensen VM, Rasmussen AW. Danish Education Registers. *Scand J Public Health* 2011 ;39(7

Suppl):91-4.

7. Statistics Denmark. Employment Available from: URL:

https://[www.dst.dk/en/Statistik/dokumentation/documentationofstatistics/income-statistics](http://www.dst.dk/en/Statistik/dokumentation/documentationofstatistics/income-statistics).

Accessed Marts 18 2019

8. Statistics Denmark. Census of Housing Available from: URL:

https://[www.dst.dk/en/Statistik/dokumentation/documentationofstatistics/census-of-housing](http://www.dst.dk/en/Statistik/dokumentation/documentationofstatistics/census-of-housing)

Accessed Marts 18 2019

**Appendix 2**

Flow charts of study cohorts of patients with a history of herpes simplex type 1 or herpes simplex type 2 central nervous system infection (HSV-1 patients and HSV-2 patients) and their respective comparison cohorts

**Appendix 3**

Diagnostic codes used in the study

**Cancers** were coded according ICD-9/ICD-10 during the complete study period. Non-melanoma skin cancers were excluded:

Cancer excluding non-melanoma skin cancer: C00.0 to C43.9 and C45.0 to C99.9

**Dementia:** F0.0 to F03.0

**Epilepsy**: G40 to G41.9

**Supplementary Figure 1. Cumulative incidence of dementia in patients with herpes simplex type 1 (HSV-1) central nervous system infection (full line) and in the comparison cohort (broken line)*.**

***No HSV-2 patients were diagnosed with dementia after the date of study inclusion**

**Supplementary Figure 2. Proportion (%) with a hospital contact with a diagnosis of epilepsy in patients with Herpes simplex virus type 1 (HSV-1) and Herpes simplex virus type 2 (HSV-2) central nervous system infection (black) and in the comparison cohorts (white).**

| **a)** **HSV-1 patients and comparison cohort members** | **b) HSV-2 patients and comparison cohort members** |
| --- | --- |
| **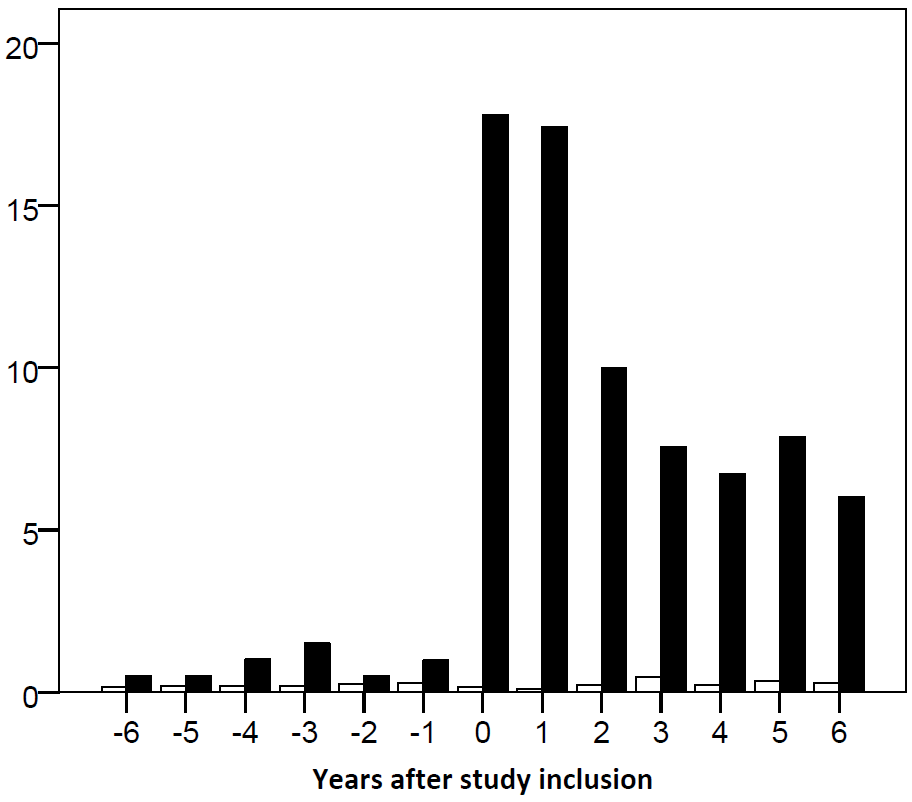** | **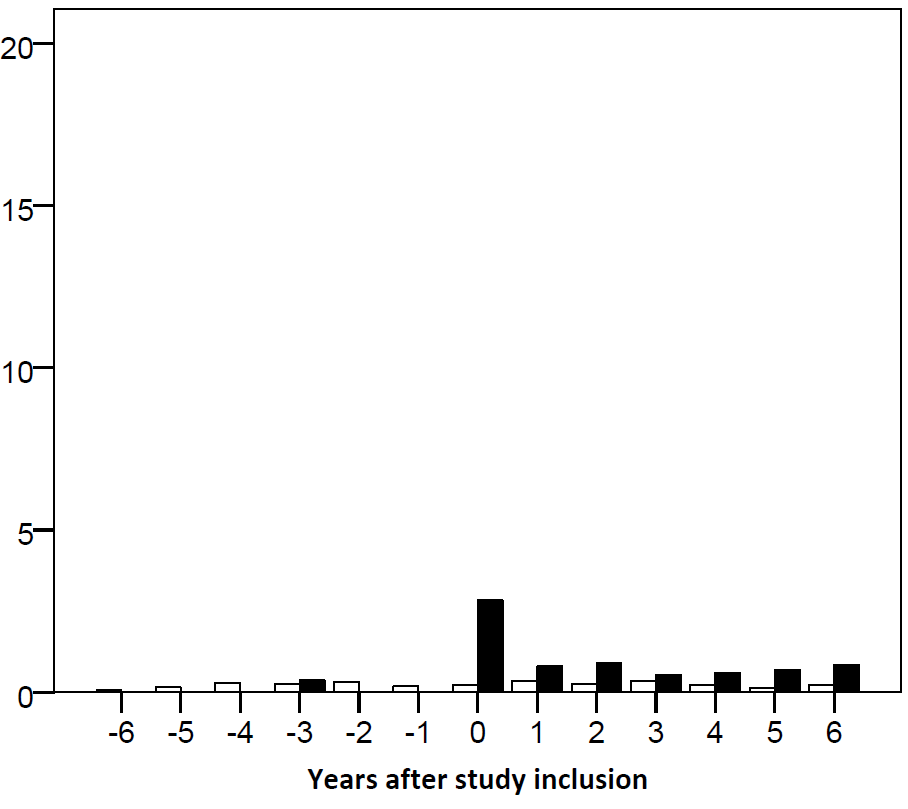** |

**Supplementary Figure 3. Mean number of inpatient days/year and mean number of outpatient hospital visits/year in patients with Herpes simplex virus type 1 (HSV-1) and Herpes simplex virus type 2 (HSV-2) central nervous system infection (black) and in the comparison cohorts (white).**

| **a)** **Mean number** **of inpatient days/year in HSV-1 patients and comparison cohort members** | **b) Mean number** **of inpatient days/year in HSV-2 patients and comparison cohort members** |
| --- | --- |
| **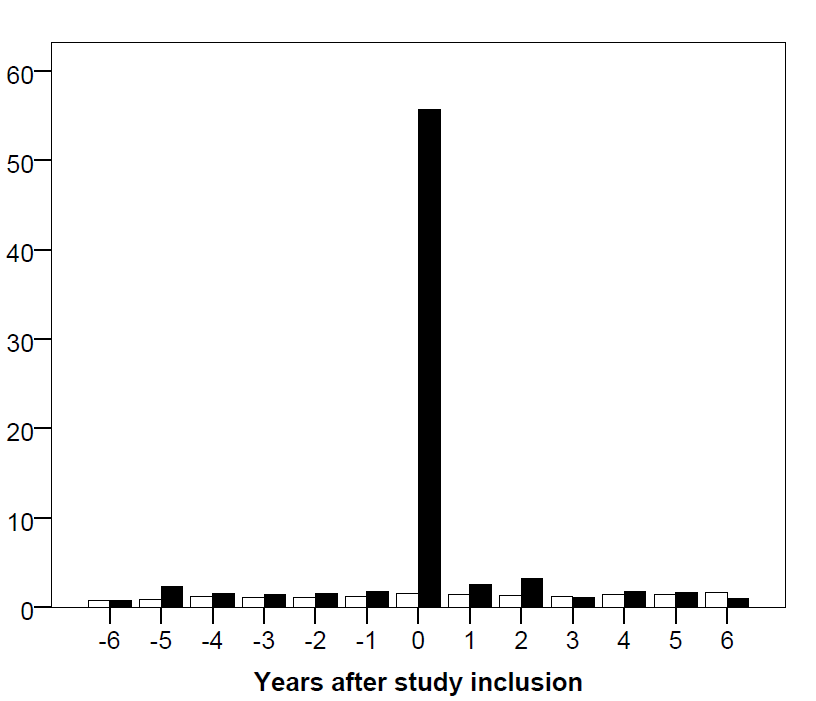** |  |
| **c)** **Mean number** **of outpatient visits/year in HSV-1 patients and comparison cohort members** | **d)** **Mean number** **of outpatient visits/year in HSV-2 patients and comparison cohort members** |
| **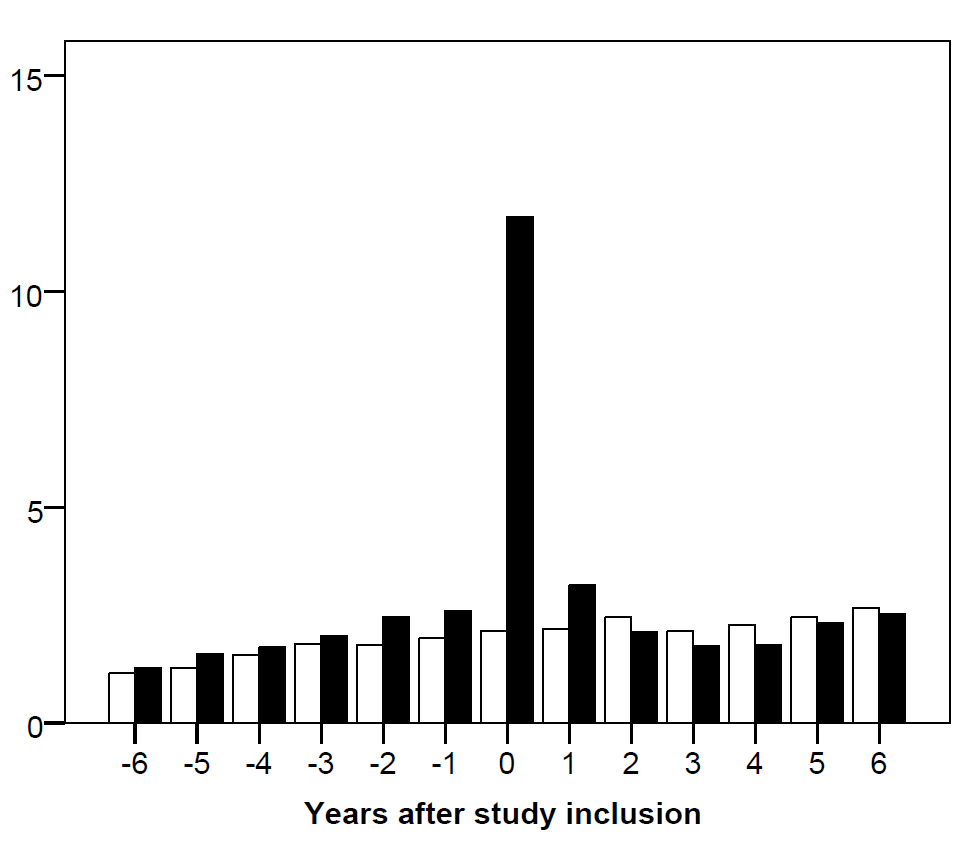** |  |

**Supplementary Figure 4. Proportion (%) visiting a department of neurology in patients with** **Herpes simplex virus type 1 (HSV-1) and Herpes simplex virus type 2 (HSV-2) central nervous system infection (black) and in the comparison cohorts (white).**

| **a)** **HSV-1 patients and comparison cohort members** | **b) HSV-2 patients and comparison cohort members** |
| --- | --- |
| **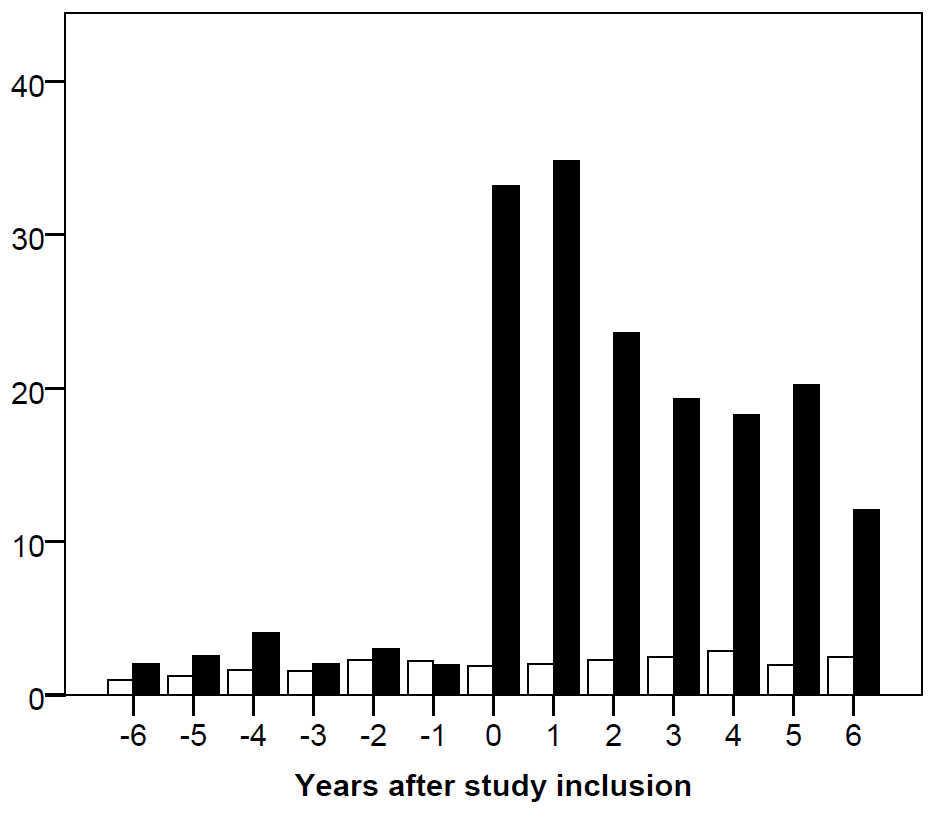** | **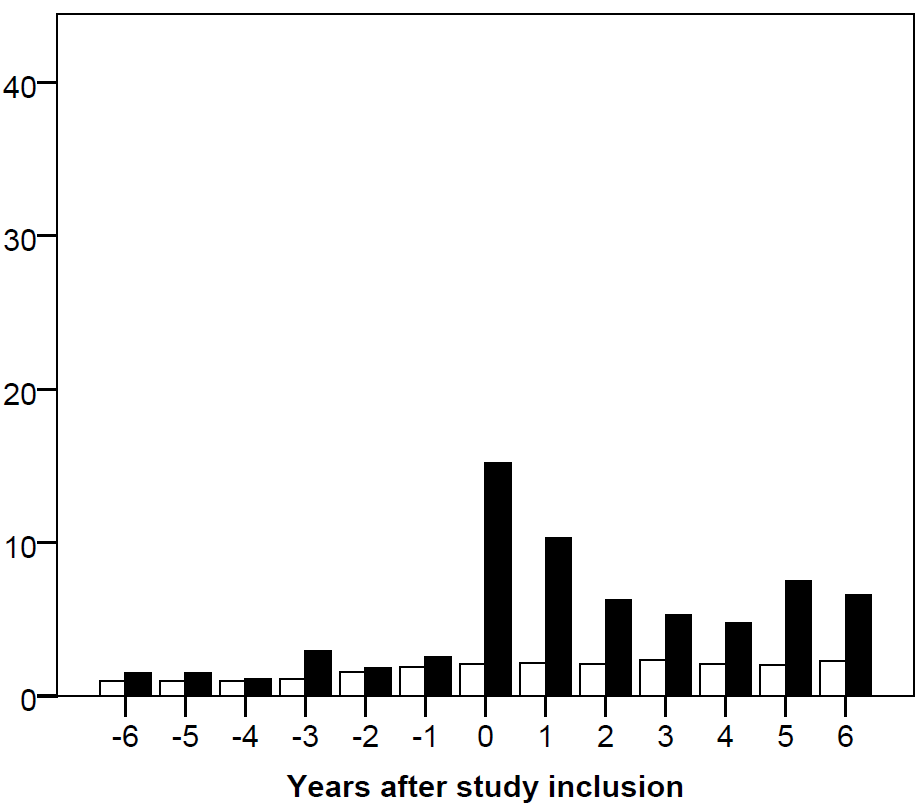** |

**Supplementary Figure 5. Proportion employed and number of sick leave days in patients with Herpes simplex virus type 1 (HSV-1) and Herpes simplex virus type 2 (HSV-2) central nervous system infection (black) and members of the population comparison cohorts (white).**

| **a)** **Proportion employed (%) in HSV-1 patients and comparison cohort members** | **b) Proportion employed (%) in HSV-2 patients and comparison cohort members** |
| --- | --- |
|  |  |
| **c)** **Mean number** **of sick leave days/year in HSV-1 patients and comparison cohort members** | **d)** **Mean number** **of sick leave days/year in HSV-2 patients and comparison cohort members** |
|  |  |

**Supplementary Figure 6. Proportion married and proportion divorced in patients with Herpes simplex virus type 1 (HSV-1) and Herpes simplex virus type 2 (HSV-2) central nervous system infection (black) and members of the population comparison cohorts (white).**

| **a)** **Proportion married (%) in HSV-1 patients and comparison cohort members** | **b) Proportion married (%) in HSV-2 patients and comparison cohort members** |
| --- | --- |
|  |  |
| **c)** **Proportion divorced (%) in HSV-1 patients and comparison cohort members** | **d)** **Proportion divorced (%) in HSV-2 patients and comparison cohort members** |
|  |  |
